1 **Germline silencing of UAS<sub>t</sub> depends on the piRNA pathway**

2

3

4

5

6

7

8

9 Yi-Chun Huang, Henry Moreno, Sarayu Row, Dongyu Jia<sup>1</sup>, and Wu-Min Deng\*

10

11

12

13

14 Department of Biological Science, Florida State University, Tallahassee, FL 32306-4295

15

16

17

18

19 \*Correspondence: [wumin@bio.fsu.edu](mailto:wumin@bio.fsu.edu)

20 <sup>1</sup> Current Address: Department of Biology, Georgia Southern University, Statesboro, GA 30460-  
21 8042

22

23

24 **Abstract**

25 One of the most extensively used techniques in *Drosophila* is the Gal4/UAS binary system,  
26 which allows tissue-specific misexpression or knockdown of specific genes of interest. The  
27 original UAS vector, UAS<sub>t</sub>, can only be activated for transgene expression in somatic tissues and  
28 not in the germline cells. Rørth (1998) generated UAS<sub>p</sub>, a modified UAS vector that is  
29 responsive to Gal4 in both somatic and germline tissues, by replacing both the *hsp70* promoter  
30 and the SV40 3'UTR with the P transposase promoter and the K10 3'UTR respectively. At  
31 present, the mechanisms by which UAS<sub>t</sub> is silenced in germline cells are not fully understood.  
32 Here, we report that the piRNA pathway is involved in suppressing UAS<sub>t</sub> expression in ovarian  
33 germline cells. Individually knocking down or mutating components of the piRNA biogenesis  
34 pathway (e.g., Piwi, AGO3, Aub, Spn-E, and Vasa) resulted in the expression of the UAS<sub>t</sub>-  
35 reporter (GFP or RFP) in the germline. An RNA-seq analysis of small RNAs revealed that the  
36 *hsp70* promoter of UAS<sub>t</sub> is targeted by piRNAs, and in the *aub* mutant ovary, the amount of  
37 piRNAs targeting the *hsp70* promoter is reduced by around 40 folds. In contrast, the SV40  
38 3'UTR of the UAS<sub>t</sub>, which happens to be targeted by the Nonsense-mediated RNA decay (NMD)  
39 pathway, is not responsible for germline UAS<sub>t</sub> suppression, as UAS<sub>t</sub>-reporters with NMD-  
40 insensitive 3'UTRs fail to show germline expression. Taken together, our studies reveal a crucial  
41 role of the piRNA pathway, potentially via the suppression of the *hsp70* promoter, in germline  
42 UAS<sub>t</sub> silencing in *Drosophila* ovaries.

43

44

45

## 46 **Introduction**

47 The success of the fruit fly *Drosophila melanogaster* as a model organism is heavily attributed to  
48 the expansive range and multitude of genetic and molecular tools available to modify gene  
49 expression at will. One such commonly used genetic tool is the transgenic Gal4/UAS system,  
50 designed for targeted gene expression (Brand and Perrimon, 1993), which allows ectopic  
51 expression of any gene (or transgene) in specific tissues, independent of their native regulators.  
52 The yeast Gal4 gene was inserted into the *Drosophila* genome under various enhancers and no  
53 deleterious effects were observed even when expressed in high levels, making it a ‘safe’ tool to  
54 use (Ryder and Russell, 2003). The system relies on the Gal4 gene product binding to and  
55 activating the Upstream Activating System (UAS). A gene of interest, inserted downstream of  
56 the UAS, will only be expressed if the Gal4 protein is first expressed and then binds to the UAS  
57 sequence.

58 The Gal4/UAS system remains one of the most useful and adaptable tools available;  
59 Duffy (2002) called it “a fly geneticist’s Swiss army knife”. However, the original UAS (UAS<sub>t</sub>)  
60 is not expressed in the germline cells of the *Drosophila* ovary (Brand and Perrimon, 1993).  
61 *Drosophila* ovaries are an extensively used model system for developmental and genetic studies  
62 and are ideal for analyzing signaling pathways and complex cellular mechanisms during  
63 oogenesis (Velentzas *et al.* 2015). In 1998, Rørth modified various components of the UAS  
64 vector, named it ‘pUAS<sub>p</sub>’ and called the original UAS vector ‘pUAS<sub>t</sub>’. UAS<sub>p</sub> has 14 Gal4-  
65 binding sites and a GAGA site which allows the target element to transpose efficiently (Rørth,  
66 1996), while UAS<sub>t</sub> has 10 Gal4-binding sites and no GAGA site (see illustration in Rørth, 1998).  
67 In order to have germline expression of UAS<sub>p</sub>, the *hsp70* promoter on UAS<sub>t</sub> was replaced by a  
68 transposase promoter, since it has high germline expression during oogenesis (Rørth 1998). In

69 addition, the termination sequence source was changed from SV40 3'UTR to K10 to prevent the  
70 destabilization of the expressed transcripts (Serano et al., 1994). Given the number of changes  
71 made to the original UAS system, it is unclear what is the exact mechanism of silencing in the  
72 germline.

73 Transposable elements (TEs, also called transposons) are mobile selfish DNA elements  
74 that exist in the genome of most eukaryotes. TEs take advantage of the host cellular machinery to  
75 replicate within the tissue and can result in mutations and chromosome instability (Halic and  
76 Moazed, 2009). Host organisms have evolved multiple mechanisms to control the mobilization  
77 of TEs to maintain genome integrity. One of these defense systems involves PIWI-interacting  
78 RNAs (piRNAs), which function primarily in germline tissues (Siomi et al., 2011). In  
79 *Drosophila*, piRNA biogenesis employs a unique 'ping-pong cycle' mechanism for piRNA  
80 processing and amplification in the *nuage*, a perinuclear structure surrounding the nurse cells in  
81 developing egg chambers (Saito et al., 2006; Brennecke et al. 2007; Malone et al. 2009; Siomi et  
82 al., 2011). The localization of *nuage* related proteins such as Vasa, Aub, and AGO3 can be used  
83 as an indicator for the piRNA biogenesis pathway (Findley et al., 2003; Lim and Kai, 2007;  
84 Malone et al., 2009; Handler et al., 2013; Lo et al., 2016).

85 In this study, we compared each component of the UAS<sub>t</sub> and UAS<sub>p</sub> vectors to determine  
86 which elements on the UAS<sub>t</sub> vector are involved in its suppression in the germline. Our findings  
87 reveal that the interaction between piRNAs and the *hsp70* promoter is responsible for the  
88 suppression of UAS<sub>t</sub>-transgene expression in the germline cells, and the interaction between  
89 NMDs and the SV40 3' UTR is unlikely to have a role in UAS<sub>t</sub> germline suppression.

90

## 91 **Materials and Methods**

### 92 *Fly stocks and genetics*

93 The following fly stocks were used in this study: *act>CD2>Gal4, UAS<sup>t</sup>-RFP<sup>nls</sup>* (BL30558);  
94 *UAS<sup>t</sup>-mRFP* (BL3417); *UAS<sup>t</sup>-GFP<sup>nls</sup>* (BL4776); *pGW-HA* (a gift from S. Yamamoto, Baylor  
95 College of Medicine); *Coin-FLP/Gal4* (BL59268); *UAS<sup>p</sup>-mGFP* (BL58721); *mat-Gal4*  
96 (BL7062); *AGO3<sup>12</sup>* (BL28269); *AGO3<sup>13</sup>* (BL28270); *aub<sup>QC42</sup>* (BL4968); *aub<sup>HN2</sup>* (BL8517); RNAi  
97 lines used in this study are listed in Tables 1 and 2. Flies were maintained and raised at 25°C.  
98 Adult female flies for Flp-out experiments were heat-shocked for 30 minutes at 37°C. Two days  
99 after heat shock, the flies were dissected to harvest ovaries. The collected ovaries were subjected  
100 to immunofluorescence staining.

### 101 *Antibodies, immunofluorescence staining and confocal microscopy*

102 Immunocytochemistry was carried out as described previously (Deng *et al.*, 2001). The  
103 following antibodies were used: rat anti-Vasa (1:300; Development Studies Hybridoma Bank),  
104 rabbit anti-HA-tag (C29F4, 1:100; Cell Signaling). Secondary antibodies were stained with  
105 Alexa Fluor® 546 or 488 and nuclear DNA was labeled with DAPI (Invitrogen). Images were  
106 acquired with a Zeiss LSM-800 confocal microscope and assembled in Adobe Illustrator.

### 107 *Quantitative RT-PCR analysis*

108 Total RNA from two-day-old *Drosophila* ovaries was isolated using Trizol Reagent (Invitrogen)  
109 according to the manufacturer's instructions and then treated with 2 U/μl of DNase I (Ambion)  
110 for 30 minutes at 37°C. One microgram of total RNA was reverse-transcribed in 20 μl of reaction  
111 mixture containing Superscript II reverse transcriptase (Invitrogen) and oligo (dT)12-18 primer  
112 according to the protocol for Superscript II first-strand cDNA synthesis system. One microliter

113 cDNA (reverse transcribed from 50 ng of RNA) was subjected to quantitative real-time PCR (in  
114 25 µl reaction volume) by using primers specific to a transposable element or RP49 (primer  
115 sequences below) and cDNA templates were amplified using the Platinum SYBR Green qPCR  
116 SuperMix UDG kit, according to the manufacturer's instructions (Invitrogen). PCR conditions  
117 are: 95°C for 10 minutes; 40 cycles of 95°C for 30 seconds, 58°C for 15 seconds, and 68°C for 45  
118 seconds. Real-time PCR was performed using the ABI 7500 Thermocycler (Applied Biosystems),  
119 and results were analyzed using SDS version 2.1 software (Austin Biodiversity Web site gallery).  
120 Data analysis was done using the  $2^{-\Delta\Delta CT}$  method for relative quantification. Calculated  
121 expression values of cDNA samples were normalized to RP49.

122 Primers:

123 Het-A: 5'-ATCCTTCACCGTCATCACCTTCCT-3' , 5'-GGTGCGTTTAGGTGAGTGTGTGTT-3' and  
124 rp49: 5'-ATGACCATCCGCCAGCATAAC-3' , 5'-CTGCATGAGCAGGACCTCCAG-3' (Pane *et al.*,  
125 2007)

126 RFP: 5'-CATCCCCGACTACATGAAGCTGT-3' , 5'-GCCCTTGAACCTTCACCTTGATAGATG-3'

127

### 128 ***Small RNA library preparation and analysis***

129 Small RNA libraries were prepared according to instructions for Illumina TrueSeq Small RNA  
130 sample prep kit; the library preparation and data analysis were as described in Lo *et. al.* (2016).  
131 Small RNA reads (>22nt) that passed quality control and the removal of rRNAs, snoRNAs and  
132 tRNAs reads by bowtie (-a --best --strata -v 1 --un) ([bowtie-bio.sourceforge.net/index.shtml](http://bowtie-bio.sourceforge.net/index.shtml))  
133 were mapped to the transgene *UASt* nucleotide sequence (detail sequence obtained from  
134 Addgene, Cambridge, MA) (-a -v 0 -m 1) by bowtie.

135

## 136 RESULTS

### 137 *UAS-reporter showed germline expression in Su(var)2-10 knockdown*

138 The bipartite Gal4/UAS system is one of the most important and widely used genetic tools in  
139 *Drosophila*. It is primarily used for *in vivo* overexpression and misexpression of genes or RNAi  
140 mediated gene knockdowns. However, the original UAS construct is not active in the germline  
141 cells of the *Drosophila* ovary; as demonstrated here when the *UAS-RFP<sup>nls</sup>* transgene was driven  
142 by a ubiquitously expressed Gal4 under the *Actin5C* promoter (*act-Gal4*), RFP expression was  
143 only detected in the somatic follicle cells, but not in the germline nurse cells or the oocyte (Fig  
144 1A). The UASp, a modified vector designed by Rørth (1998), by contrast, can be activated in  
145 both somatic and germline cells, as shown here the *UASp-mCD8GFP* transgene, driven by the  
146 same *act-Gal4*, showed expression in both the follicle cells and nurse cells in the ovary (Fig 1A').

147 In a genome-wide *in vivo* RNAi screen to identify genes that potentially regulate Notch  
148 signaling in follicle cells (Jia et al., 2015), we used the Flp-out Gal4/UAS system  
149 (*act>CD2>Gal4, UAS-RFP<sup>nls</sup>*) (Ito et al., 1997; Pignoni and Zipursky, 1997) to generate  
150 knockdown mosaics in ovarian cells. Although the RFP reporter expression is restricted to the  
151 somatic cells since it is cloned on the UAS vector, the collection of TRiP RNAi lines used for  
152 this experiment are effective in both the somatic and germline cells (Ni et al., 2011).  
153 Unexpectedly, we found that the RFP signal was detected in some nurse cells in mosaic egg  
154 chambers with *Su(var)2-10* (CG8086) knockdown (Fig 1B). Consistently, when the CoinFLP  
155 system (Bosch et. al., 2015), which also carries the *Actin5C* promoter to generate mosaic Gal4  
156 expression, was used to drive *Su(var)2-10*-TRiP-RNAi expression, UAS-GFP expression was  
157 also detected in the nurse cells (Fig 1D). These results suggest that *Su(var)2-10* plays a role in  
158 suppressing UAS-transgene expression in the germline.

159 ***The piRNA pathway in germline suppression of UAS***

160 *Su(var)2-10* has been shown to be potentially involved in piRNA biogenesis, chromosome  
161 stability and epigenetic regulations (Hari *et al.*, 2001; Muerdter *et al.*, 2013). We asked if any of  
162 these molecular functions are disrupted in the ovarian germline cells when *Su(var)2-10* is  
163 knocked down, and found that Vasa localization in the *nuage* in nurse cells (Fig 1F) was  
164 significantly reduced. This phenocopies the piRNA pathway mutants (Malone *et al.*, 2009),  
165 suggesting that *Su(var)2-10* is a part of the piRNA biogenesis machinery.

166 Next, we performed a candidate RNAi screen of genes involved in small RNA biogenesis,  
167 epigenetic regulation, or heat shock responses. This was to determine if any of them would  
168 suppress UAS-reporter expression in the germline, in a similar manner to *Su(var)2-10*. Among  
169 the 28 genes examined (Table 1), six belonged to the piRNA biogenesis pathway and all of them  
170 showed some UAS-RFP expression in germline nurse cells when knocked down using the Flip-  
171 out Gal4 to generate mosaics (*piwi* (Fig 2A), *aub* (Fig 2B), *AGO3* (Fig 2C), *spn-E* (Fig 2D), *vas*  
172 (Fig 2E), or *zuc* (Fig 2F)). Interestingly, we also found germline expression of UAS-RFP when  
173 *Hsp83* was knocked down (Fig 3A, circled with a dashed line). *Hsp83* has been reported to be  
174 involved in piRNA biogenesis, and is normally enriched in the *nuage* (Olivieri *et al.*, 2012). As  
175 expected, we observed Vasa mislocalization when *Hsp83* was knocked-down (Fig 3A',  
176 arrowheads), a phenotype that is consistent with piRNA gene mutations. In contrast, we did not  
177 detect any UAS-RFP expression in the germline cells in control egg chambers with Luciferase  
178 knockdown (n = 423, Table 1).

179 We then examined UAS-reporter expression in the germline of mutants defective in  
180 piRNA production. We expressed *act-Gal4* driven UAS-RFP (*act>UAS-RFP*) in a trans-  
181 heterozygous mutant of *AGO3* (*AGO3<sup>t2/t3</sup>*), and found that all *AGO3<sup>t2/t3</sup>* mutant ovaries expressed



182 RFP in both somatic and germline cells (Fig 4B, 100%, n = 57). By contrast, *AGO3*<sup>t2/+</sup>  
183 heterozygous egg chambers showed RFP expression only in the somatic follicle cells (Fig 4A).  
184 We also tested the expression of UAS-RFP driven by *mat-tub-Gal4*, a germline specific Gal4, in  
185 *aub*<sup>QC42/HN2</sup> trans-heterozygous mutants. As expected, RFP expression was detected in both the  
186 nurse cells and the oocyte during oogenesis (Fig 4D). Taken together, these results indicate that  
187 the suppression of UAS-transgene expression in the germline depends on the piRNA biogenesis  
188 pathway.

189 To determine whether UAS-RFP suppression is at the transcription level, we performed  
190 quantitative RT-PCR (qRT-PCR) analyses, and found the RFP transcript level was 1.3-fold  
191 higher in *AGO3*<sup>t2/t3</sup> trans-heterozygous ovaries than the *AGO3*<sup>t2/+</sup> heterozygous controls. As a  
192 control, we examined the expression of Het-A, a transposable element that is targeted by piRNAs  
193 (Brennecke *et al.*, 2007), and found a 60-fold increase of the Het-A transcript in *AGO3*<sup>t2/t3</sup>  
194 mutant ovaries (Fig 4C'), indicating that piRNA production is indeed strongly suppressed in  
195 these ovaries. Together, these results suggest that germline expression of UAS-RFP is  
196 suppressed by piRNAs at the transcriptional level (Fig 4C).

### 197 ***The hsp70 promoter is a piRNA target***

198 To determine exactly how piRNAs suppress UAS-transgene expression in the germline, we  
199 performed a RNA-seq analysis of small RNAs from ovaries of *aub*<sup>QC42/HN2</sup> and *w*<sup>1118</sup> flies. After  
200 mapping the piRNAs from the RNA-seq analysis on to the pUAS sequence, we found that the  
201 *hsp70* promoter was heavily targeted by piRNAs in *w*<sup>1118</sup> flies (Fig 5A, B). This result is  
202 consistent with the report that the *hsp70* locus itself provides the substrates for high piRNA  
203 production in transgenic lines (Olonikov *et al.*, 2013). By contrast, *aub*<sup>QC42/HN2</sup> ovaries had a  
204 significantly reduced level (~40-fold lower) of piRNAs targeting the *hsp70* promoter sequence

205 compared with the  $w^{1118}$  controls (Fig. 5B). These findings, along with the qRT-PCR results that  
206 *AGO3<sup>t2/t3</sup>* mutant ovaries had elevated levels of the UAS<sub>t</sub>-RFP transcript, suggest that the *hsp70*  
207 promoter in the UAS<sub>t</sub> vector is targeted by piRNAs from the *hsp70* locus, thus suppressing  
208 UAS<sub>t</sub>-transgene transcription in the germline cells.

### 209 ***The 3'UTR is not the cause of UAS<sub>t</sub> germline suppression***

210 Besides the promoter, the other major difference between UAS<sub>t</sub> and UAS<sub>p</sub> is the 3'UTR tail.  
211 UAS<sub>t</sub> has an SV40 3'UTR, whereas UAS<sub>p</sub> carries a K10 tail (Rørth, 1998). Metzstein and  
212 Krasnow (2006) discovered that the nonsense-mediated mRNA decay factors (NMD) targeted  
213 the SV40 3'UTR sequence, thereby suppressing the expression of upstream genes. To determine  
214 whether NMD is involved in germline UAS<sub>t</sub> suppression, we examined the expression of a  
215 modified UAS<sub>t</sub>-GFP, which contains a shortened SV40 3' UTR excluding the NMD binding site  
216 (Metzstein and Krasnow 2006). When driven by *act-Gal4*, this NMD-non-sensitive line (K45)  
217 showed no ovarian germline expression of UAS<sub>t</sub>-GFP (Fig 6A-B). We further tested another  
218 modified UAS<sub>t</sub> vector, the pGW construct (Bischof *et al.*, 2013), which has *tubulin* 3' UTR  
219 instead of the SV40 3'UTR. Using the Flp-out Gal4 system, we co-expressed UAS<sub>t</sub>-RFP and  
220 GW-HA in the ovary, and detected neither RFP nor HA proteins in germline cells (Fig 6C).  
221 Additionally, we knocked down genes involved in the NMD pathway (*Upf1*, *Upf2*, *Upf3*, *Smg1*,  
222 and *Smg5*), individually, and no germline UAS<sub>t</sub>-reporter expression was detected in the ovary  
223 (Table 2). Taken together, these results suggest that the SV40 3' UTR and NMD pathway are  
224 not involved in germline UAS<sub>t</sub> silencing.

225

## 226 **Discussion**

227 The Gal4/UAS system has been used extensively in a variety of forms and adaptations for a wide  
228 range of applications. However, the one downside is that the original UAS<sub>t</sub> is not expressed by  
229 germline cells of *Drosophila* ovaries, which limits the experimental power of germline cells.  
230 Rørth (1998) succeeded in making a functional ‘pUAS<sub>p</sub>’ system for use in both germline and  
231 somatic cells by modifying two important components of the system, the *hsp70* promoter and the  
232 SV40 3’ UTR. In this study, we analyzed each component on the UAS<sub>t</sub> that is different from  
233 those on the UAS<sub>p</sub>. We show that the *hsp70* promoter targeted by piRNAs is crucial in the  
234 silencing of UAS<sub>t</sub>-transgene expression in germline cells. Although the SV40 3’ UTR can be  
235 silenced by nonsense-mediated mRNA decay factors (NMD), it did not seem to affect UAS<sub>t</sub>  
236 germline expression. From a technical standpoint, this new understanding of how UAS<sub>t</sub>-  
237 transgene is silenced in *Drosophila* germline cells could lead to new and better design of  
238 transgenes to be expressed in different tissues in this powerful genetic model organism.

239 piRNAs are abundant in the germline and can repress transposable elements (TE), which  
240 prevents the disruption of the genome and reduces the rates of mutation (Ku and Lin, 2014). It  
241 has been previously reported that transgene-derived piwi-interacting RNAs (piRNAs) are  
242 complementary to the *hsp70* promoter and can cleave and process non-homologous regions of  
243 the endogenous *hsp70* transcripts into more piRNAs (Olovnikov *et al.* 2013). Our RNA-seq  
244 analysis confirmed that the basic *hsp70* promoter on pUAS<sub>t</sub> is a target for piRNAs, and these  
245 piRNAs are significantly reduced when the piRNA biogenesis pathway is disrupted. Hsp70 is the  
246 principal inducible heat shock protein in *Drosophila*, with both protective and deleterious roles  
247 during development (Feder and Krebs 1998, Zatssepina *et al.* 2001). A previous study proposed  
248 the possible involvement of Hsp70 in the biogenesis of piRNA in *Drosophila* following severe  
249 heat-shock conditions, but could not conclusively determine the details of this regulatory process

250 (Funikov *et al* 2015). This, in combination with our findings, suggest that piRNAs may be  
251 involved in the heat-stress induced response mediated by increased Hsp70 levels for normal  
252 development. Future studies will need to address the detailed mechanisms by which piRNAs are  
253 able to regulate *hsp70* in this tissue. The overarching question regarding the developmental  
254 significance of this differential pattern of *hsp70* expression in the germline and somatic cells of  
255 the *Drosophila* ovary remains to be answered.

256

## 257 **Acknowledgements**

258 We thank members of the Deng laboratory for technical support and discussions. We thank S.  
259 Yamamoto for suggestions and fly stocks; M. Metzstein, the Developmental Studies Hybridoma  
260 Bank, and Bloomington *Drosophila* Stock Center (BDSC) for antibodies, and fly stocks. We  
261 thank the Biology Imaging Laboratory, the Molecular Core Facility, the Translational Science  
262 Laboratory and the Center for Genomics and Personalized Medicine at Florida State University.  
263 We also thank D. Corcoran, P. Michael Albert II and Righting Your Writing, LLC for assistance  
264 with editing the manuscript. W.-M. D. is supported by NIH Grant R01GM072562 and NSF  
265 Grant IOS-1557904.

266

## 267 **References**

268 Bischof, J., Björklund, M., Furger, E., Schertel, C., Taipale, J., Basler, K. (2013). A versatile  
269 platform for creating a comprehensive UAS-ORFeome library in *Drosophila*. *Development*,  
270 140(11), 2434-2442.

- 271 Brand, A. & Perrimon, N. (1993). Targeted gene-expression as a means of altering cell fates and  
272 generating dominant phenotypes. *Development*, 118(2), 401-415.
- 273 Bosch, J. A., Tran, N. H., Hariharan I. K. (2015). CoinFLP: a system for efficient mosaic  
274 screening and for visualizing clonal boundaries in *Drosophila*. *Development*, 142(3), 597-606.
- 275 Brennecke J., Aravin A.A., Stark, A., Dus, M., Kellis, M., Sachidanandam, R., Hannon, G. J.  
276 (2007). Discrete small RNA-generating loci as master regulators of transposon activity in  
277 *Drosophila*. *Cell* 128: 1089–1103.
- 278 Deng, W. M., Althausen, C., H. Ruohola-Baker. (2001). Notch-Delta signaling induces a  
279 transition from mitotic cell cycle to endocycle in *Drosophila* follicle cells. *Development*, 128:  
280 4737-4746.
- 281 Duffy, J. (2002). GAL4 system in drosophila: A fly geneticist's swiss army knife. *Genesis*, 34(1  
282 2), 1-15.
- 283 Feder, M. E. & Krebs, R. A. (1998) Natural and genetic engineering of the heat-shock protein  
284 hsp70 in *Drosophila Melanogaster*: Consequences of thermotolerance. *American Zoology*, 38,  
285 503-517.
- 286 Findley, S. D., Tamanaha, M., Clegg, N. J., Ruohola-Baker, H. (2003). Maelstrom, a *Drosophila*  
287 spindle-class gene, encodes a protein that colocalizes with Vasa and RDE1/AGO1 homolog,  
288 Aubergine, in nuage. *Development*, 130, 859-871.
- 289 Funikov, S. Y., Ryazansky, S. S., Zelentsova, E. S., Popenko, V. I., Leonova, O. G., Garbuz, D.  
290 G., Evgen'ev, M. B. Zatssepina, O. G. (2015). The peculiarities of piRNA expression upon heat  
291 shock exposure in *Drosophila melanogaster*. *Mobile Genetic Elements*, 5(5), 72-80.

- 292 Halic, M. & Moazed, D., (2009) Transposon silencing by piRNAs. *Cell*, 138, 1058-1060.
- 293 Handler, D., Karpowicz, P., Binari, R., Booker, M., Brennecke, J., Perkins, L. A., Hannon, G. J.,  
294 Perrimon, N. (2011). A genome-scale shRNA resource for transgenic RNAi in *Drosophila*.  
295 *Nature Methods*, 8(5), 405-407.
- 296 Handler, D., Meixner, K., Pizka, M., Lauss, K., Schmied, C., Gruber, F. S., Brennecke, J. (2013).  
297 The genetic makeup of the *Drosophila* piRNA pathway. *Molecular Cell*, 50, 762-777.
- 298 Hari, K. L., Cook, K.R., Karpen, G.H. (2001). The *Drosophila* Su(var)2-10 locus regulates  
299 chromosome structure and function and encodes a member of the PIAS protein family. *Genes &*  
300 *Development*, 15, 1334-1348.
- 301 Ito, K., Awano, W., Suzuki, K., Hiromi, Y., Yamamoto, D. (1997). The *Drosophila* mushroom  
302 body is a quadruple structure of clonal units each of which contains a virtually identical set of  
303 neurones and glial cells. *Development*, 124, 761-771.
- 304 Jia, D., Soylemez, M., Calvin, G., Bornmann, R., Bryant, J., Hanna, C., Huang, Y. C., Deng, W.  
305 M. (2015). A large-scale in vivo RNAi screen to identify genes involved in Notch-mediated  
306 follicle cell differentiation and cell cycle switches. *Scientific Reports*, 5, 12328.
- 307 Kantidze, O. L., Velichko, A. K., Razin, S. V. (2015). Heat stress-induced transcriptional  
308 repression. *Biochemistry-Moscow*, 80(8), 990-993.
- 309 Ku, H. & Lin, H. (2014). PIWI proteins and their interactors in piRNA biogenesis, germline  
310 development and gene expression. *National Science Review*, 1(2), 205-218.
- 311 Lim, A. K. & Kai, T., (2007). Unique germ-line organelle, nuage, functions to repress selfish  
312 genetic elements in *Drosophila melanogaster*. *Proc Natl Acad Sci USA*, 104, 6714-6719.

- 313 Lo, P. K., Huang, Y. C., Poulton, J. S., Leake, N., Palmer, W. H., Vera, D., Xie, G., Klusza, S.,  
314 Deng, W. M. (2016). RNA helicase Belle/DDX3 regulates transgene expression in *Drosophila*.  
315 *Developmental Biology*, 412 (1): 57-70.
- 316 Malone, C. D., Brennecke, J., Dus, M., Stark, A., McCombie, W. R., Sachidanandam, R.,  
317 Hannon, G. J., (2009). Specialized piRNA pathways act in germline and somatic tissues of the  
318 *Drosophila* ovary. *Cell*,137: 522-35.
- 319 Metzstein, M. M., & Krasnow, M. A. (2006). Functions of the nonsense-mediated mRNA decay  
320 pathway in drosophila development. *PLoS Genetics*, 2(12), 2143-2154.
- 321 Muerdter, F., Guzzardo, P. M., Gillis, J., Luo, Y., Yu, Y., Chen, C., Fekete, R., Hannon, G. J.  
322 (2013). A genome wide RNAi screen draws a genetic framework for transposon control and  
323 primary piRNA biogenesis in *Drosophila*. *Molecular Cell*, 50(5), 736-748.
- 324 Ni, J-Q, Zhou, R., Czech, B., Liu, L-P, Holderbaum, L., Yang-Zhou, D., Shim, H-S., Tao, R.,  
325 Handler, D., Karpowicz, P., Binari, R., Booker, M., Brennecke, J., Perkins, L. A., Hannon, G. J.,  
326 Perrimon, N. (2011). A genome-scale shRNA resource for transgenic RNAi in *Drosophila*.  
327 *Nature Methods*, 8, 405-407.
- 328 Olivieri, D., Senti, K. A., Subramanian, S., Sachidanandam, R., Brennecke, J. (2012). The  
329 cochaperone shutdown defines a group of biogenesis factors essential for all piRNA populations  
330 in *Drosophila*. *Molecular Cell*, 47(6), 954-969.
- 331 Olovnikov, I., Ryazansky, S., Shpiz, S., Lavrov, S., Abramov, Y., Vaury, C., Jensen, S.,  
332 Kalmykova, A. (2013). *De novo* piRNA cluster formation in the *Drosophila* germ line triggered

- 333 by transgenes containing a transcribed transposon fragment. *Nucleic Acids Research*, 41(11),  
334 5757-5768.
- 335 Pandey, U. B., & Nichols, C. D. (2011). Human disease models in *Drosophila melanogaster* and  
336 the role of the fly in therapeutic drug discovery. *Pharmacological Reviews*, 63(2), 411-436.
- 337 Pane, A., Wehr, K., Schüpbach, T. (2007). zucchini and squash encode two putative nucleases  
338 required for rasiRNA production in the *Drosophila* germline. *Developmental Cell*, 12(6):851-62.
- 339 Pignoni, F., & Zipursky, S. L., (1997). Induction of *Drosophila* eye development by  
340 decapentaplegic. *Development*, 124, 271–278.
- 341 Rørth, P. (1996). A modular misexpression screen in *Drosophila* detecting tissue-specific  
342 phenotypes. *Proceedings of the National Academy of Sciences of the United States of*  
343 *America*, 93(22), 12418-12422.
- 344 Rørth, P. (1998). Gal4 in the *Drosophila* female germline. *Mechanisms of Development*, 78(1–2),  
345 113-118.
- 346 Ryder, E., & Russell, S. (2003). Transposable elements as tools for genomics and genetics in  
347 *Drosophila*. *Briefings in Functional Genomics & Proteomics*, 2(1), 57-71.
- 348 Saito, K., Nishida, K. M., Mori, T., Kawamura, Y., Miyoshi, K., Nagami, T., Siomi, H., Siomi, M.  
349 C. (2006). Specific association of Piwi with rasiRNAs derived from retrotransposon and  
350 heterochromatic regions in the *Drosophila* genome. *Genes & Development*, 20, 2214-2222.
- 351 Serano, T., Cheung, H., Frank, L., Cohen, R. (1994). P-element transformation vectors for  
352 studying *Drosophila melanogaster* oogenesis and early embryogenesis. *Gene*, 138(1-2), 181-186.



353 Sheth, U., & Parker, R. (2006). Targeting of aberrant mRNAs to cytoplasmic processing  
354 bodies. *Cell*, *125*(6), 1095-1109.

355 Siomi, M. C., Sato, K., Pezic, D., Aravin, A. A. (2011). PIWI-interacting small RNAs: The  
356 vanguard of genome defense. *Nature Reviews Molecular Cell Biology*, *12*(4), 246-258.

357 Specchia, V., Piacentini, L., Tritto, P., Fanti, L., D'Alessandro, R., Palumbo, G., Pimpinelli, S.  
358 Bozzetti, M. P. (2010). Hsp90 prevents phenotypic variation by suppressing the mutagenic  
359 activity of transposons. *Nature*, *463*(7281), 662-692.

360 Velentzas, A. D., Anagnostopoulos, A. K., Velentzas, P. D., Mpakou, V. E., Sagioglou, N. E.,  
361 Tsioka, M. M., Katarachia, S., Manta, A. K., Konstantakou, E. G., Papassidieri, I. S., Tsangaris,  
362 G. T. H., Stravopodis, D. J. (2015). Global proteomic profiling of drosophila ovary: A high-  
363 resolution, unbiased, accurate and multifaceted analysis. *Cancer Genomics & Proteomics*, *12*(6),  
364 369-384.

365 Zatssepina, O. G., Velikodvorskaia, V. V., Molodtsov, V. B., Garbuz, D., Lerman, D. N.,  
366 Bettencourt, B. R., Feder, M. E., Evgenev, M. B. (2001) A *Drosophila melanogaster* strain from  
367 sub-equatorial Africa has exceptional thermotolerance but decreased hsp70 expression. *Journal*  
368 *of Experimental Biology*, *204*:1869-1881.

369

370

## 371 **Figure Legends**

372 **Figure 1. Ectopic germline expression of UAS $t$  in *Su(var)2-10* knockdown egg chambers.**

373 Broken red lines mark the germline. (A-A'') Gal4 expressed under *act* promoter: UAS $t$ -RFP was

374 observed only in follicle/somatic cells; however, UASp-mCD8GFP was expressed in both  
375 somatic and germline cells in the same egg chamber. (B, B') Flp-out Gal4 with *Su(var)2-10* KD:  
376 UAS<sub>t</sub>-RFP was now also observed in germline cells. (C) Control Flp-out Gal4: UAS<sub>t</sub>-RFP does  
377 not have germline expression. (D, D') CoinFLP-Gal4 with *Su(var)2-10* KD: ectopic germline  
378 UAS<sub>t</sub>-GFP expression; compare to control (E). (F, F') Wild-type egg chamber (left) and  
379 *Su9var)2-10* knockdown egg chamber (right) stained for the Vasa protein. Control egg chamber  
380 has Vasa localization in the nuage (red arrow head); *Su(var)2-10* KD (indicated by an asterisk,  
381 and with germline UAS<sub>t</sub>-RFP expression in F') had no/reduced Vasa protein in nuage). Nuclei  
382 were labeled with DAPI. Posterior is to the right. Scalebars 10 μm.

383 **Figure 2. piRNA pathway suppresses germline UAS<sub>t</sub> expression.** Targeted genetic screen  
384 with Flp-out *act-Gal4* found that UAS<sub>t</sub>-RFP can be expressed in germline cells when KD of  
385 following piRNA components (A) *piwi*, (B) *aub*, (C) *AGO3*, (D) *spn-E*, (E) *vas*, and (F) *zuc*.  
386 Nuclei were labeled with DAPI. Posterior is to the right. Scalebars 10 μm.

387 **Figure 3. *Hsp83* suppresses germline UAS<sub>t</sub> expression via the piRNA pathway.** *Hsp83*  
388 Knockdown egg chamber (right); compare to control egg chamber (left). *Hsp83* KD egg chamber  
389 has germline *UAS<sub>t</sub>-RFP* expression (A) and mislocalized Vasa protein (arrowhead) (A')  
390 compared to wild-type Vasa localization in (A'). Nuclei were labeled with DAPI. Posterior is to  
391 the right. Scalebars 10 μm.

392 **Figure 4. Silencing of germline UAS<sub>t</sub>-transgene expression is transcriptionally regulated.**

393 (A) Heterozygous *AGO3*<sup>t2</sup> allele showed only follicle/somatic expression of UAS<sub>t</sub>-RFP driven  
394 by *act-Gal4*. (B) Trans-heterozygous *AGO3*<sup>t2/t3</sup> egg chambers displayed both somatic and  
395 germline UAS<sub>t</sub>-RFP expression. (C) qRT-PCR results. Overall RNA level of RFP from trans-  
396 heterozygous *AGO3*<sup>t2/t3</sup> ovaries was higher (1.3 fold), compared to heterozygous *AGO3*<sup>t2</sup> ovaries.

397 Increased HeT-A expression (60 fold) indicated the piRNA pathway was inactive in *AGO3*<sup>t2/t3</sup>  
398 mutant alleles. (D) UAS<sub>t</sub>-RFP driven by *mat-tub-Gal4*, a germline specific driver, also displayed  
399 germline UAS<sub>t</sub>-RFP expression in trans-heterozygous *aub*<sup>QC42/HN2</sup> egg chambers. Nuclei were  
400 labeled with DAPI. Posterior is to the right. Scalebars 10 μm.

401 **Figure 5. *hsp70* promoter is a piRNA target.** Small RNA deep sequencing from wild-type and  
402 *aub*<sup>QC42/HN2</sup> ovaries were mapped to the UAS<sub>t</sub> sequence. X axis: position of the major  
403 compositions of the UAS<sub>t</sub>. Y axis: normalized aligned read counts for piRNA. (A) The piRNA  
404 sequencing reads (>22 nt) from ovary samples for wild-type (top plot) and trans-heterozygous  
405 *aub*<sup>QC42/HN2</sup> (bottom plot). (B) Closed view of *hsp70* promoter and SV40 3'UTR sequences from  
406 the mapping result. This figure was generated by R.

407 **Figure 6. 3'UTR of UAS<sub>t</sub> is not involved in germline silencing of UAS<sub>t</sub>.** (A) UAS<sub>t</sub>-K37-GFP  
408 reporter line, with the wild-type SV40 3'UTR (NMD sensitive), (B) UAS<sub>t</sub>-K45-GFP reporter  
409 line, with a shortened SV40 3'UTR (NMD insensitive), and (C) pGW-HA-tag line with a tubulin  
410 3'UTR. (A-C'') Driven by *act-Gal4* along with UAS<sub>t</sub>-RFP. None of the above showed  
411 expression of UAS<sub>t</sub> in germline cells. Nuclei were labeled with DAPI. Posterior is to the right.  
412 Scalebars 10 μm.

Fig 1

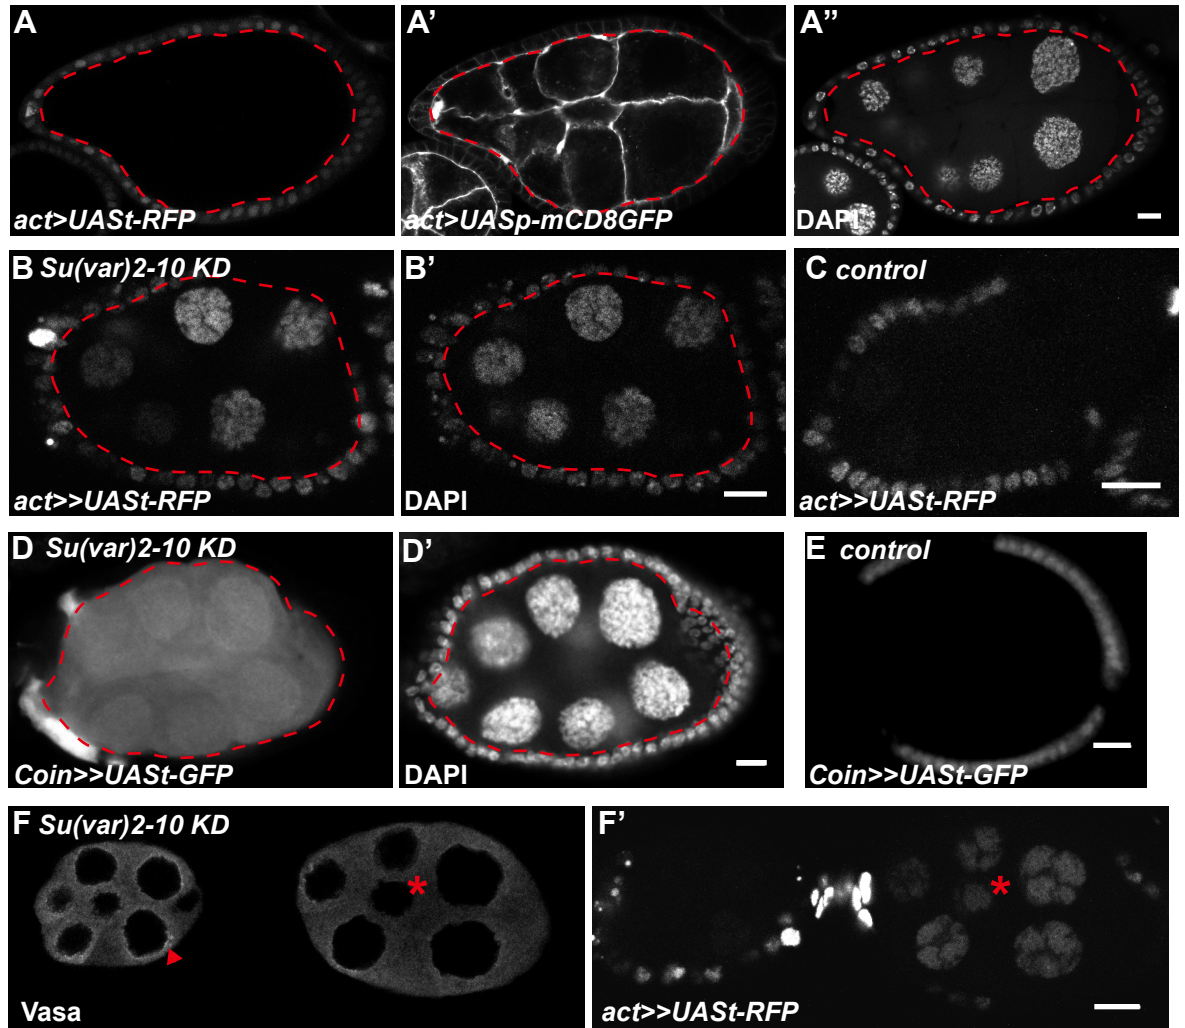

Fig 2

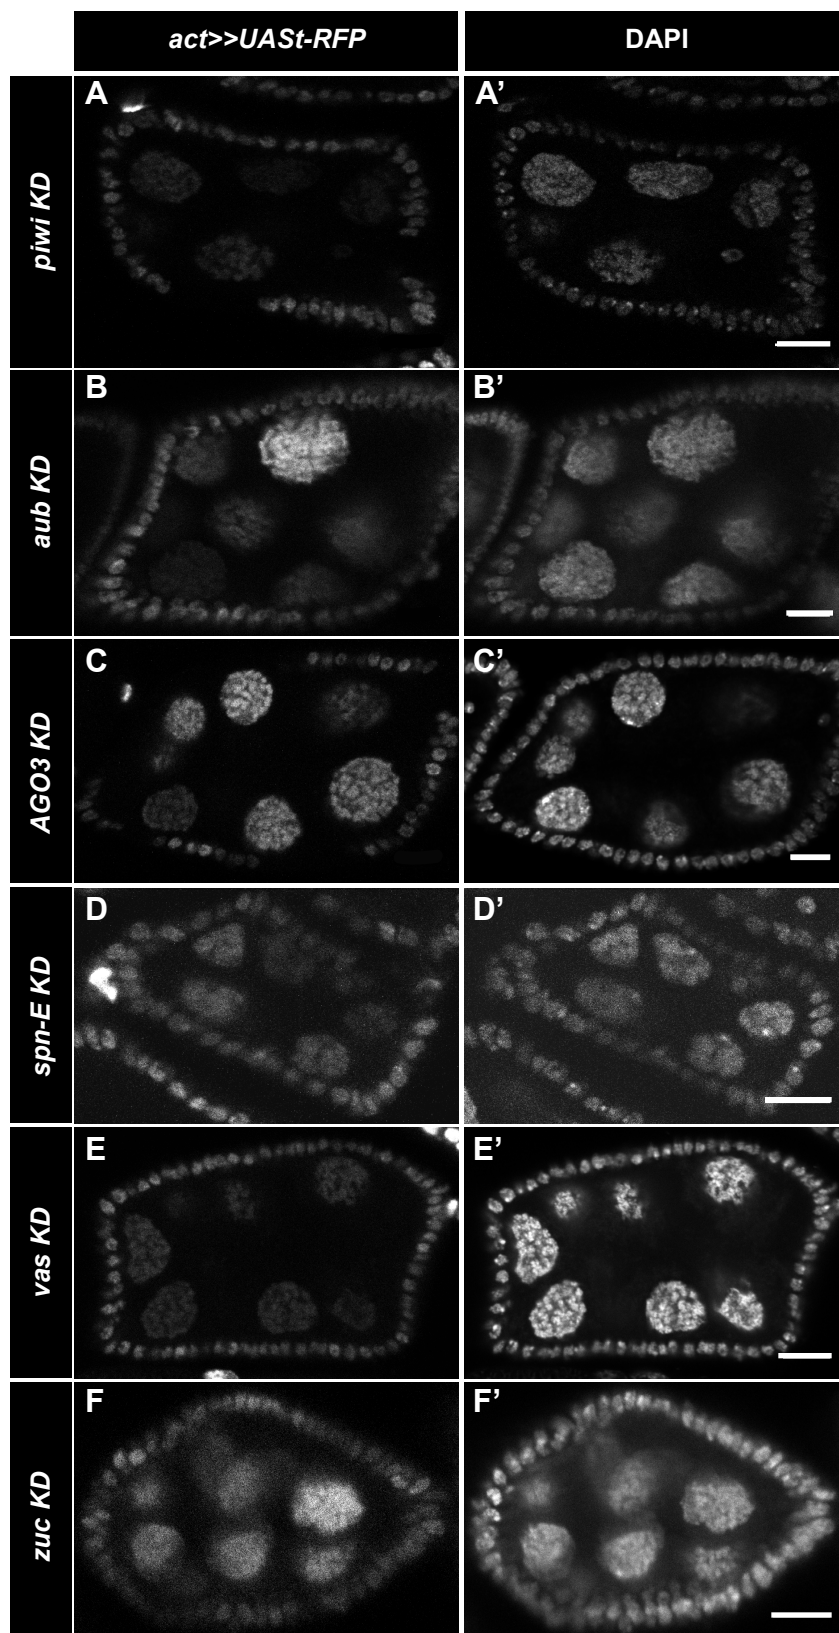

Fig 3

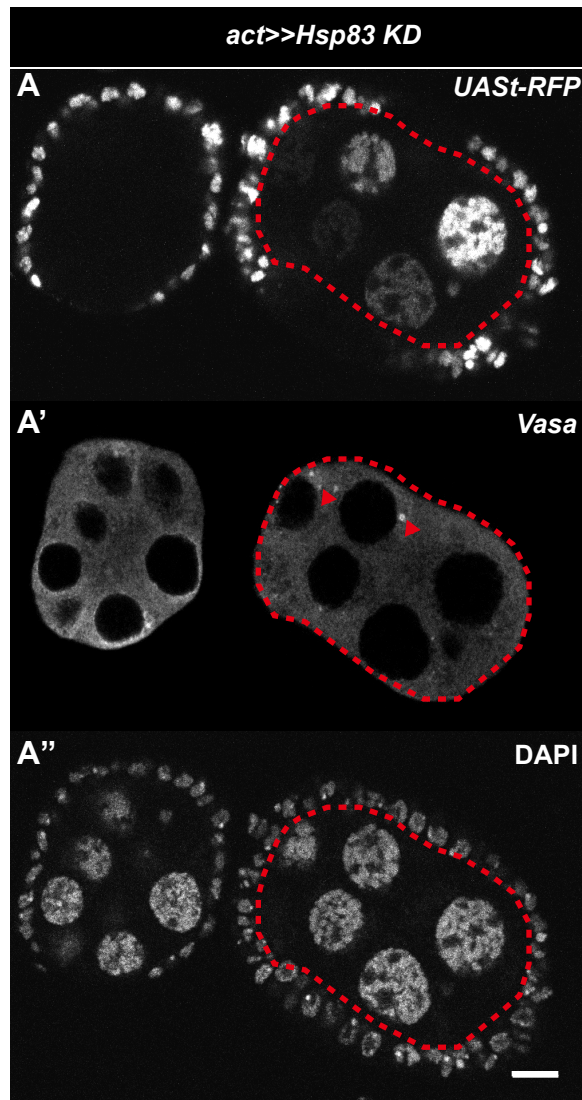

Fig 4

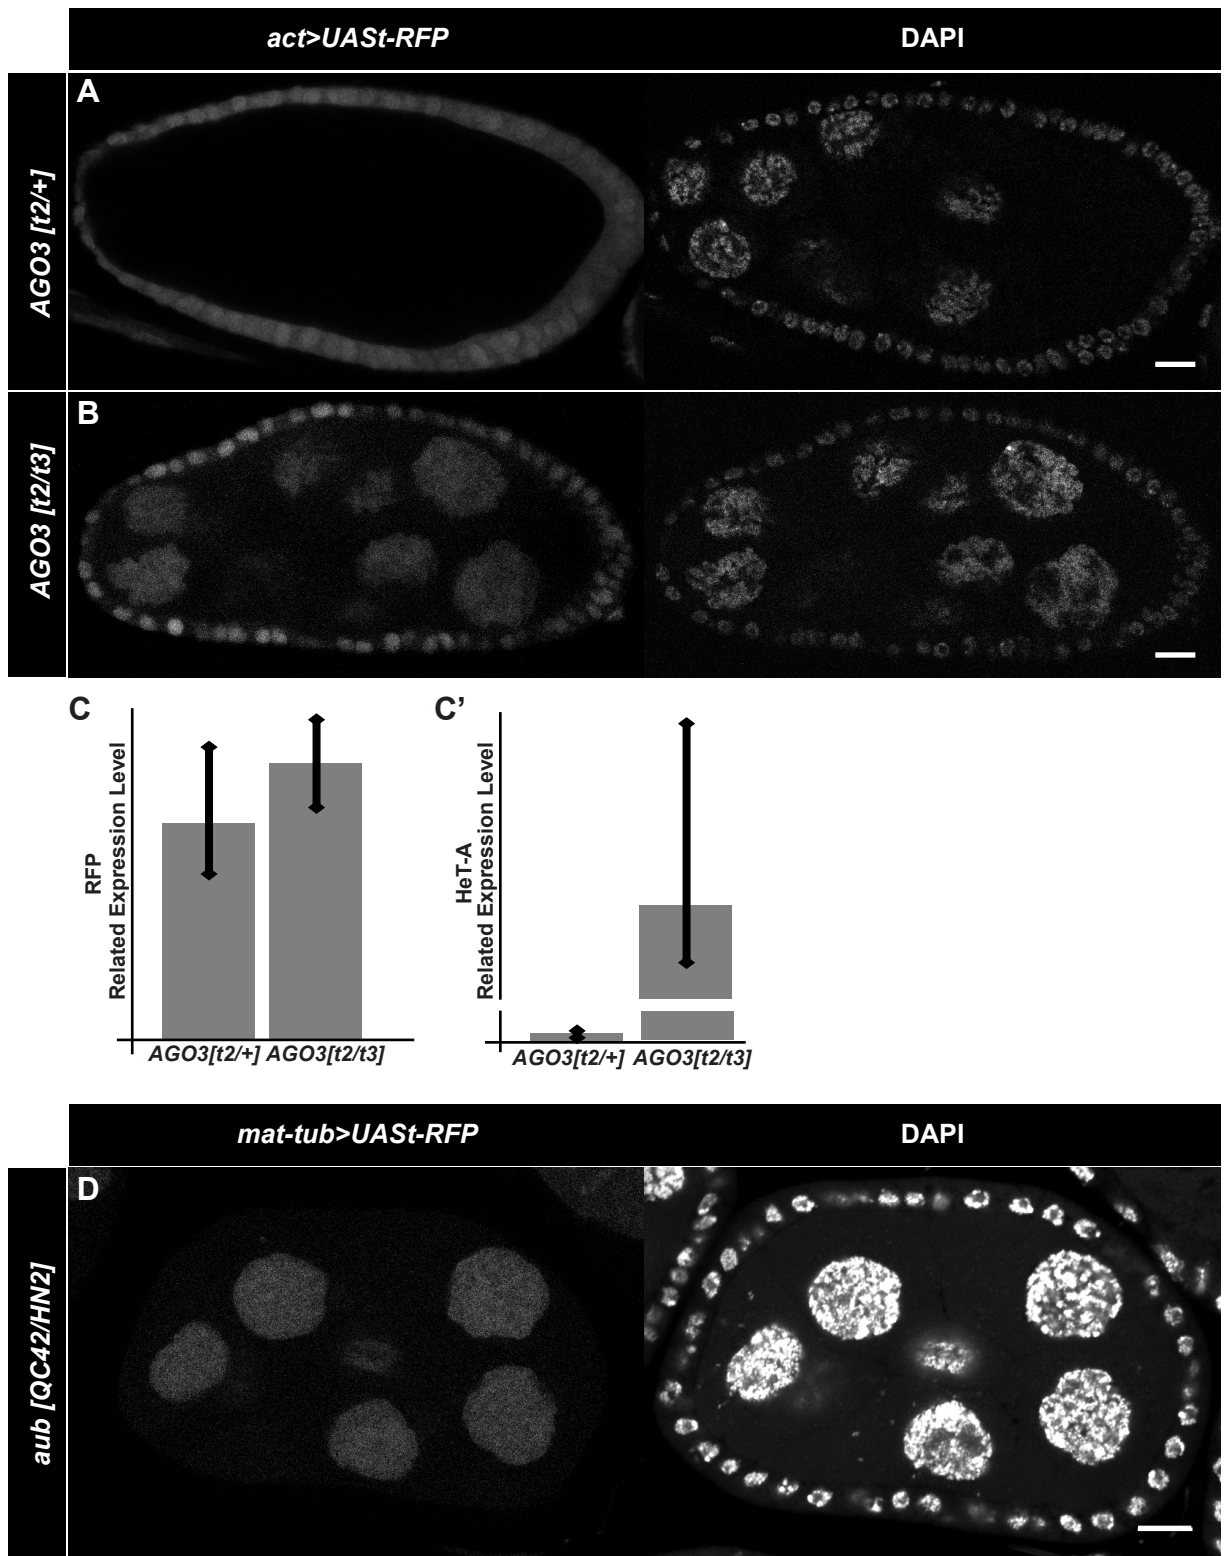

Fig 5

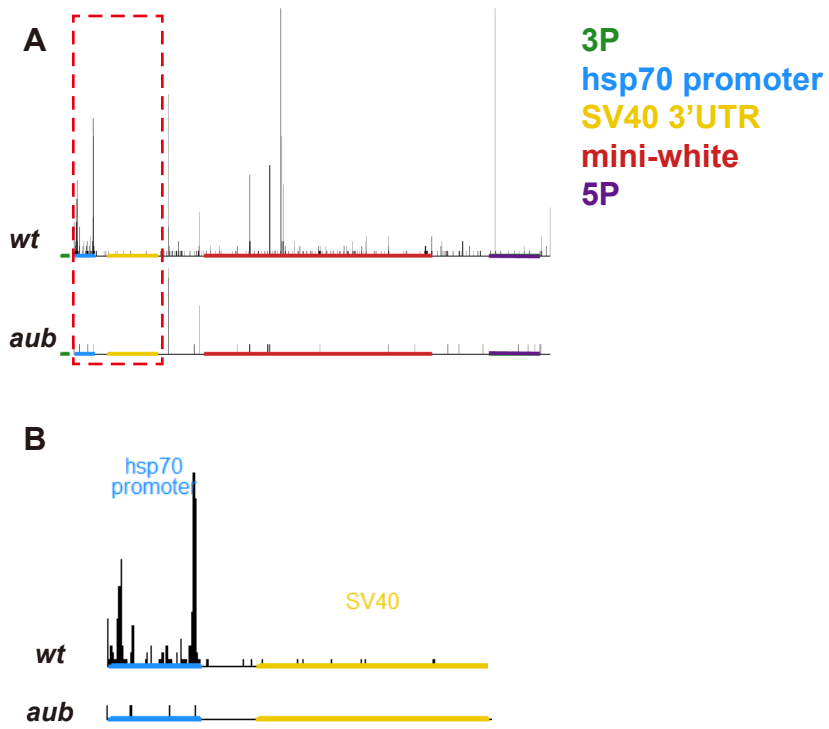



Fig 6

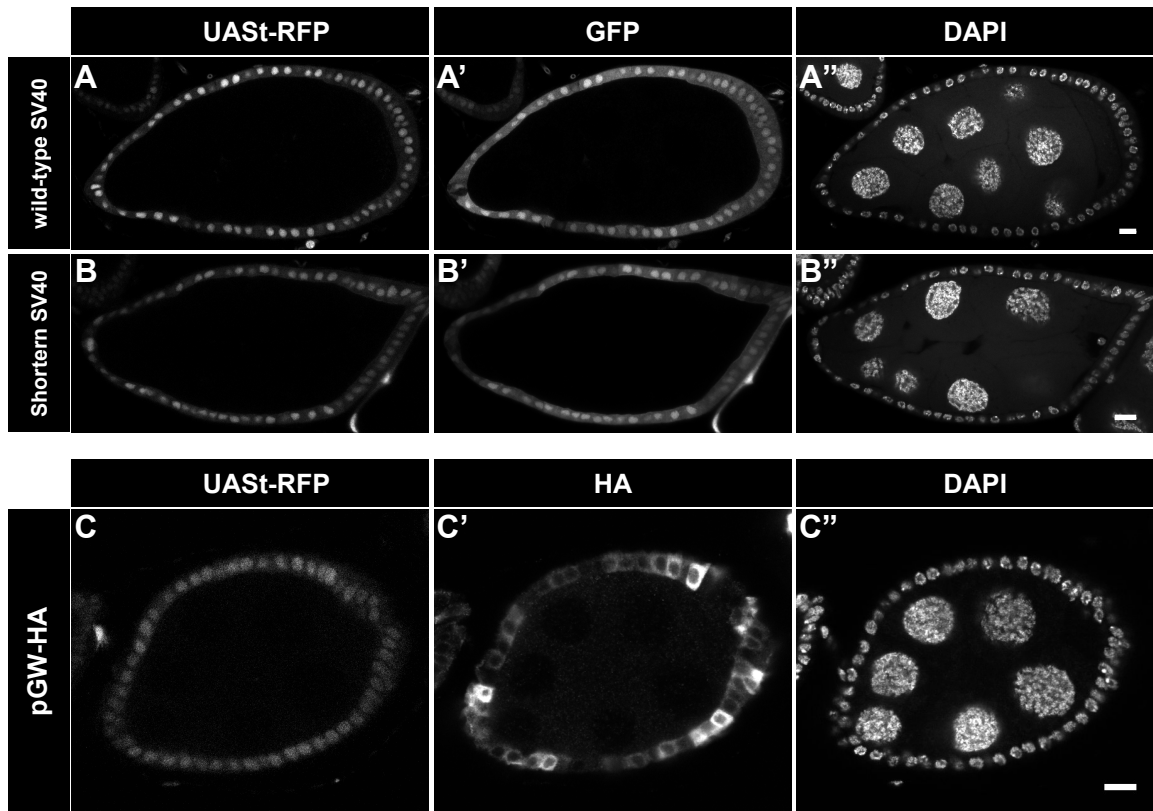

**Table 1. Trip lines of targeted genetic screen**

| Category                               | Genes             | Stocks  | UAS <sup>t</sup> Expressed in Germline |
|----------------------------------------|-------------------|---------|----------------------------------------|
| <b>Control &amp; randomly selected</b> | Luciferase        | BL35788 | NO                                     |
|                                        | psi               | BL34825 | NO                                     |
|                                        | Dl                | BL34322 | NO                                     |
| <b>small RNA</b>                       | <b>su(var)210</b> | BL29448 | NO                                     |
|                                        |                   | BL31623 | NO                                     |
|                                        |                   | BL32956 | <b>YES</b>                             |
|                                        |                   | BL32915 | <b>YES</b>                             |
|                                        | su(var)3-9        | BL32914 | NO                                     |
|                                        | su(var)205        | BL33400 | NO                                     |
|                                        | <b>piwi</b>       | BL33724 | <b>YES</b>                             |
|                                        | <b>spn-E</b>      | BL34808 | <b>YES</b>                             |
|                                        | <b>aub</b>        | BL39026 | <b>YES</b>                             |
|                                        | tejas             | BL41928 | NO                                     |
|                                        | AGO1              | BL33727 | NO                                     |
|                                        | <b>AGO3</b>       | BL44543 | <b>YES</b>                             |
|                                        | <b>vasa</b>       | BL34950 | <b>YES</b>                             |
|                                        | kr                | BL34632 | NO                                     |
|                                        | me31B             | BL33675 | NO                                     |
|                                        | <b>zuc</b>        | BL36742 | <b>YES</b>                             |
| R2D2                                   | BL34784           | NO      |                                        |
| <b>Insulators</b>                      | mod(mdg4)         | BL32995 | NO                                     |
|                                        |                   | BL33907 | NO                                     |
|                                        | su(HW)            | BL34006 | NO                                     |
|                                        |                   | BL33906 | NO                                     |
|                                        | CP190             | BL33903 | NO                                     |
|                                        |                   | BL33944 | NO                                     |
|                                        | CTCF              | BL40850 | NO                                     |
|                                        | BEAF-32           | BL29734 | NO                                     |
| GAF/Trl                                | BL40940           | NO      |                                        |
| <b>Polycomb</b>                        | E(z)              | BL33659 | NO                                     |
|                                        | Su(z)12           | BL33402 | NO                                     |
|                                        | Pc                | BL33622 | NO                                     |
|                                        |                   | BL33964 | NO                                     |
|                                        | pea               | BL32838 | NO                                     |
| <b>Hsp protein</b>                     | Hsp70B            | BL32997 | NO                                     |
|                                        |                   | BL33948 | NO                                     |
|                                        | Hop               | BL34002 | NO                                     |
|                                        |                   | BL32979 | NO                                     |
|                                        | <b>Hsp83</b>      | BL33947 | <b>YES</b>                             |

**Table 2. Genes involved in NMD regulation**

| Category   | Genes | Stocks  | UAS <sub>t</sub> Expressed in Germline |
|------------|-------|---------|----------------------------------------|
| <b>NMD</b> | Upf1  | BL43144 | NO                                     |
|            | Upf2  | BL31095 | NO                                     |
|            | Upf3  | BL44565 | NO                                     |
|            |       | BL58181 | NO                                     |
|            | Smg1  | BL41945 | NO                                     |
|            |       | BL35349 | NO                                     |
|            | Smg5  | BL31090 | NO                                     |
|            |       | BL62261 | NO                                     |
